# Supplementary material for: Ring-tension adjusted ethylene polymerization by aryliminocycloheptapyridyl nickel complexes
Source: Royal Society of Chemistry journal article supplement (doi:10.1039/c5dt01831e), 2015-01-01
Supplement: c5dt01831e1.pdf [file c5dt01831e1.pdf]

## Supporting Information

for

### Ring-tension Adjusted Ethylene Polymerization by Aryliminocyclo- heptapyridylnickel Complexes

Fang Huang,<sup>a,b</sup> Zelin Sun,<sup>b</sup> Shizhen Du,<sup>b</sup> Erlin Yue,<sup>b</sup> Junjun Ba,<sup>a,b</sup> Xinquan Hu,<sup>\*,a</sup>

Tongling Liang,<sup>b</sup> Griselda B. Galland,<sup>c</sup> and Wen-Hua Sun<sup>\*,b,d</sup>

<sup>a</sup> College of Chemical Engineering, Zhejiang University of Technology, Hangzhou 310014, China.

<sup>b</sup> Key laboratory of Engineering Plastics and Beijing National Laboratory for Molecular Science, Institute of Chemistry, Chinese Academy of Sciences, Beijing 100190, China.

<sup>c</sup> Instituto de Química, Universidade Federal do Rio Grande do Sul, Av. Bento Gonçalves 9500, 91501-970 Porto Alegre, Brasil.

<sup>d</sup> State Key Laboratory for Oxo Synthesis and Selective Oxidation, Lanzhou Institute of Chemical Physics, Chinese Academy of Sciences, Lanzhou 730000, China.

### Table of Contents

|                                                                                     |    |
|-------------------------------------------------------------------------------------|----|
| <sup>1</sup> H and <sup>13</sup> C NMR Spectra of organic compounds <b>L1-L5</b>    | 2  |
| FT-IR spectra of organic compounds <b>L1-L5</b> and nickel complexes <b>Ni1-Ni5</b> | 7  |
| GPC curves of obtained polyethylenes additional to main text                        | 10 |

NMR

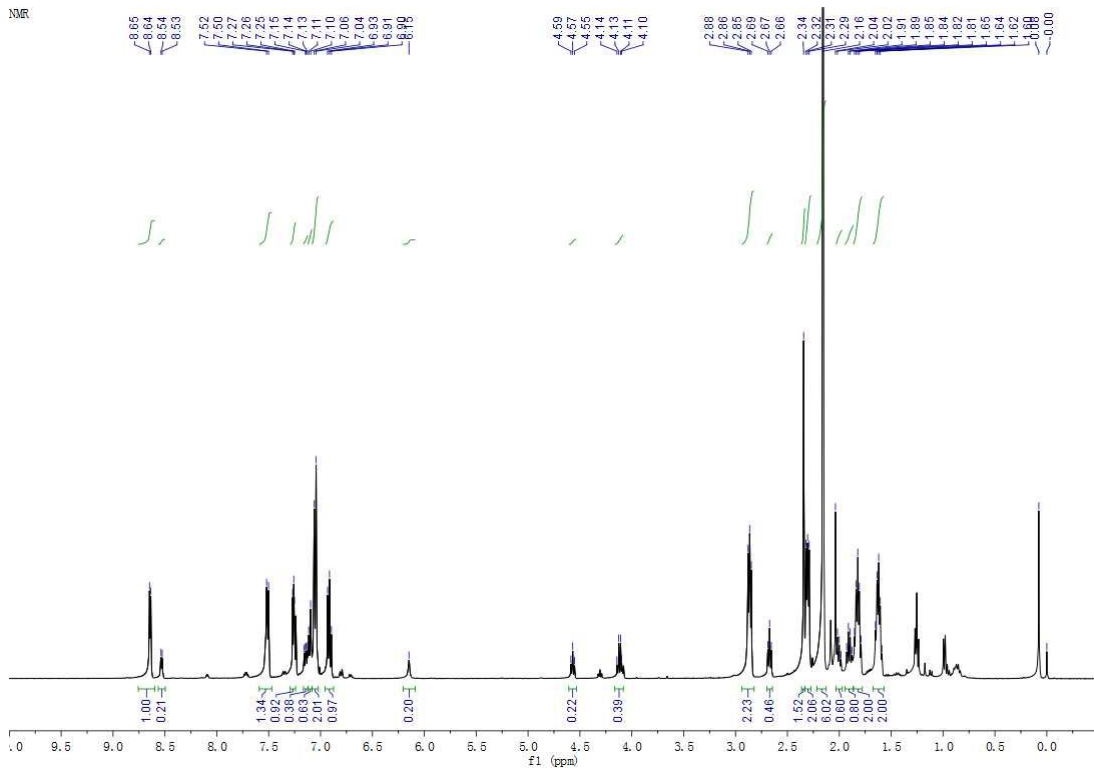

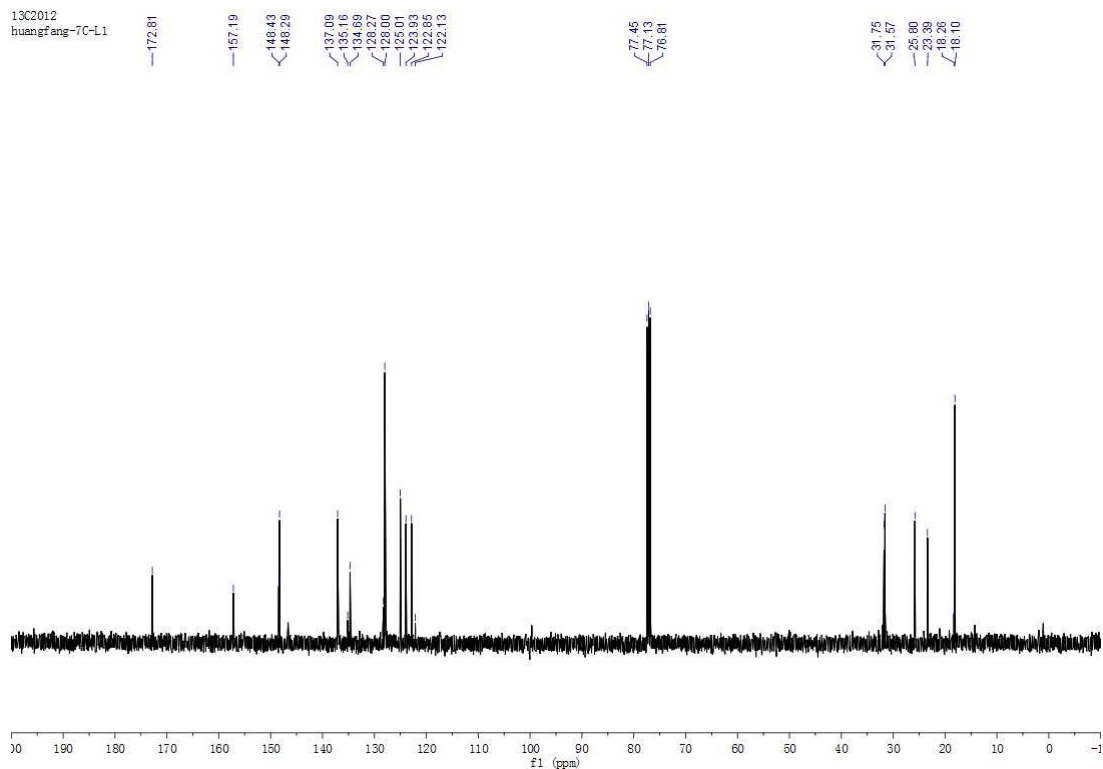

Figure S1. <sup>1</sup>H-NMR (top) and <sup>13</sup>C-NMR (bottom) spectra of compound L1 (in CDCl<sub>3</sub>)

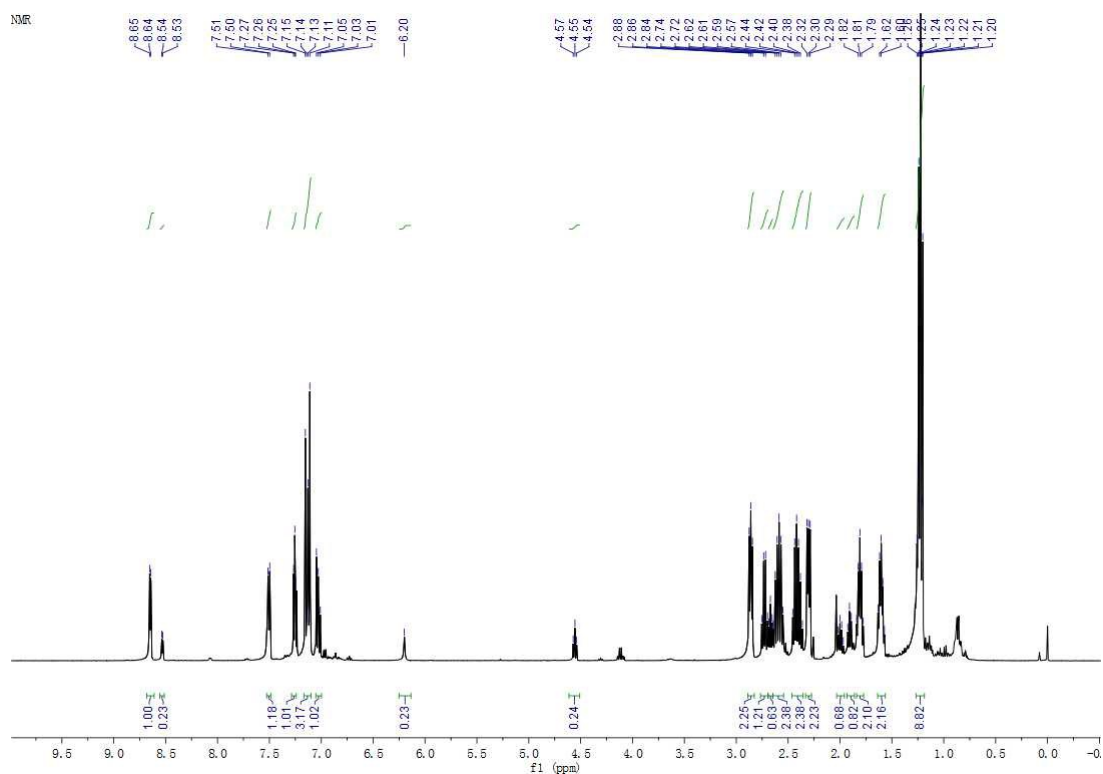

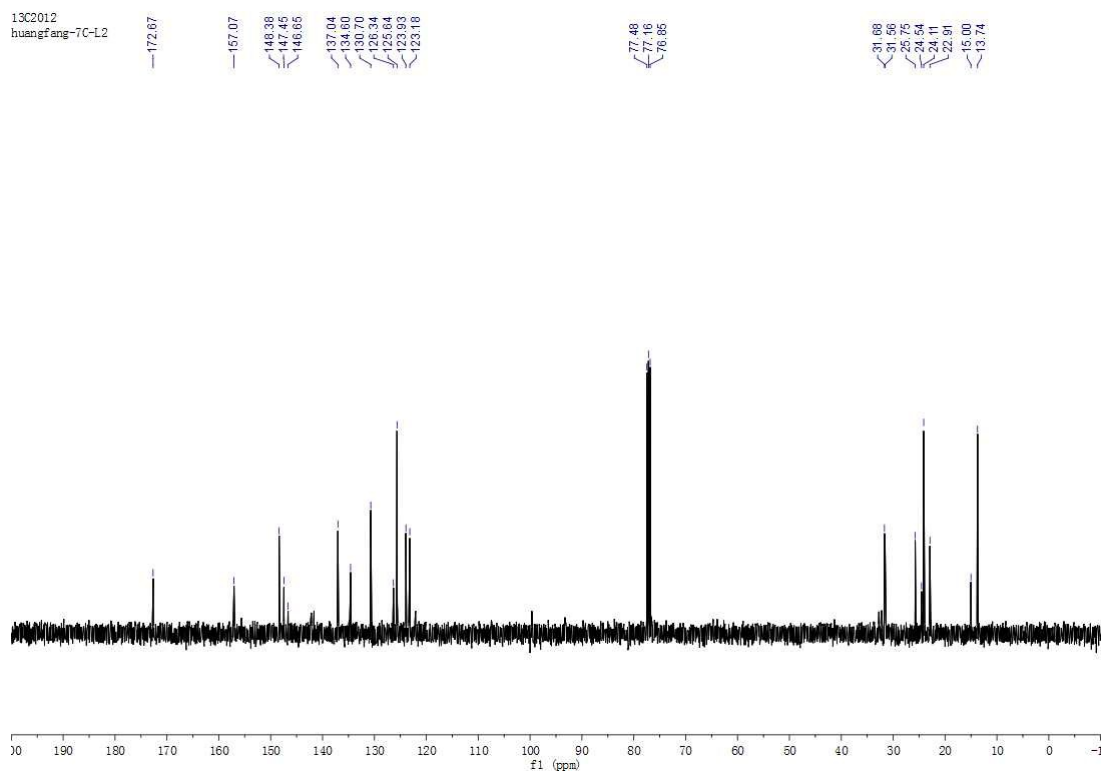

**Figure S2.**  $^1\text{H-NMR}$  (top) and  $^{13}\text{C-NMR}$  (bottom) spectra of compound **L2** (in  $\text{CDCl}_3$ )

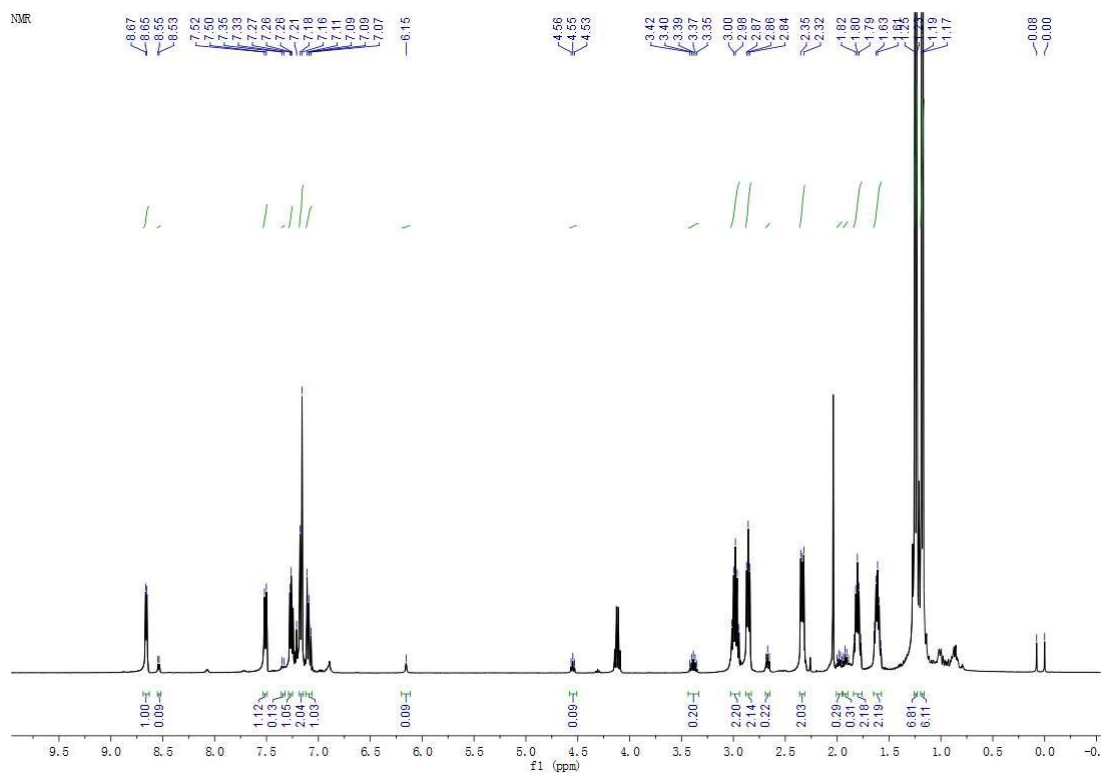



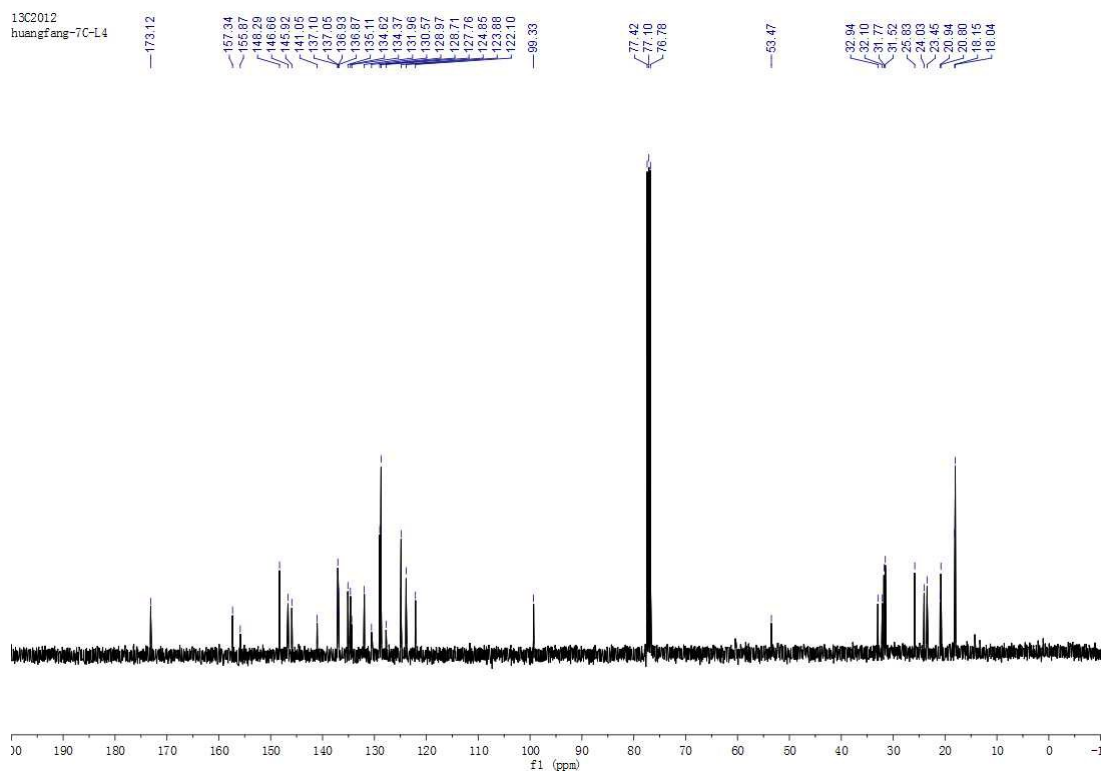

Figure S4.  $^1\text{H-NMR}$  (top) and  $^{13}\text{C-NMR}$  (bottom) spectra of compound L4 (in  $\text{CDCl}_3$ )

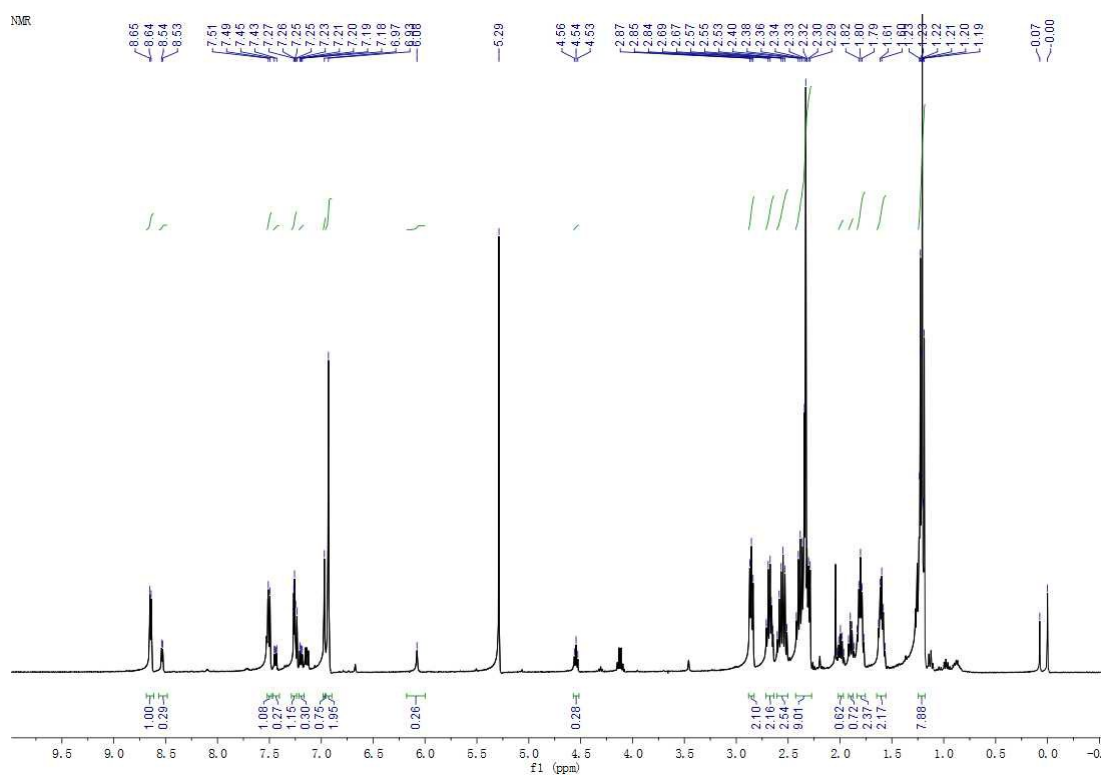

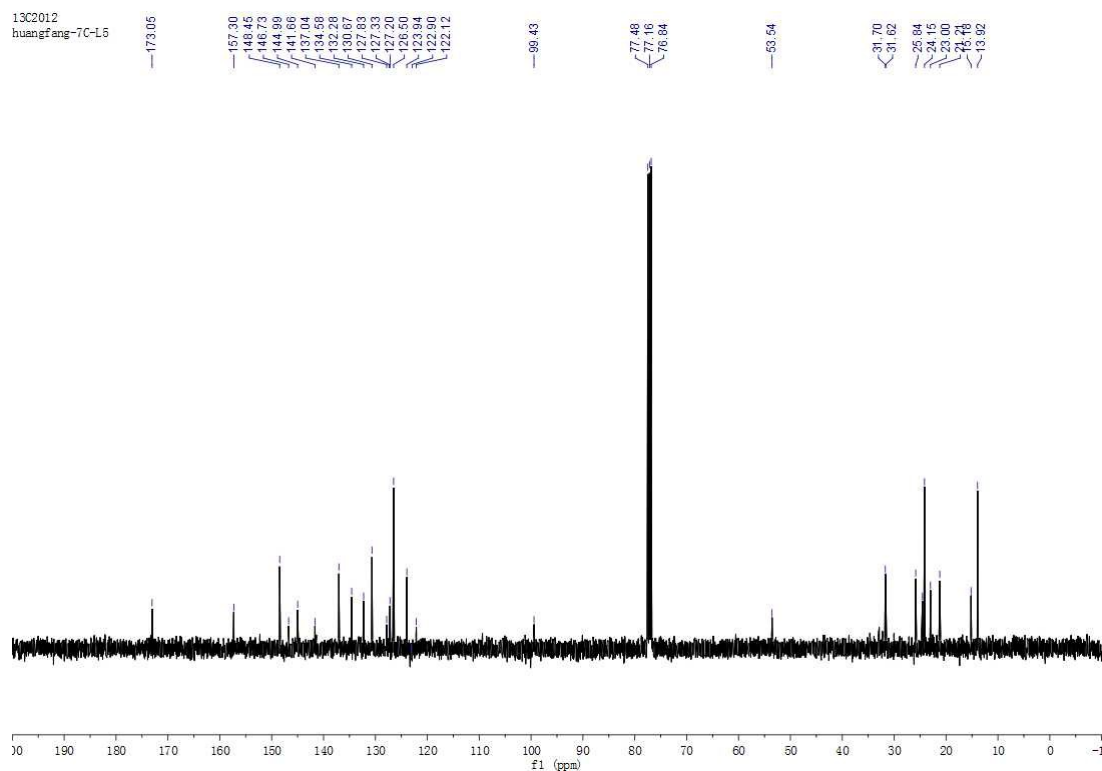

Figure S5.  $^1\text{H-NMR}$  (top) and  $^{13}\text{C-NMR}$  (bottom) spectra of compound **L5** (in  $\text{CDCl}_3$ )

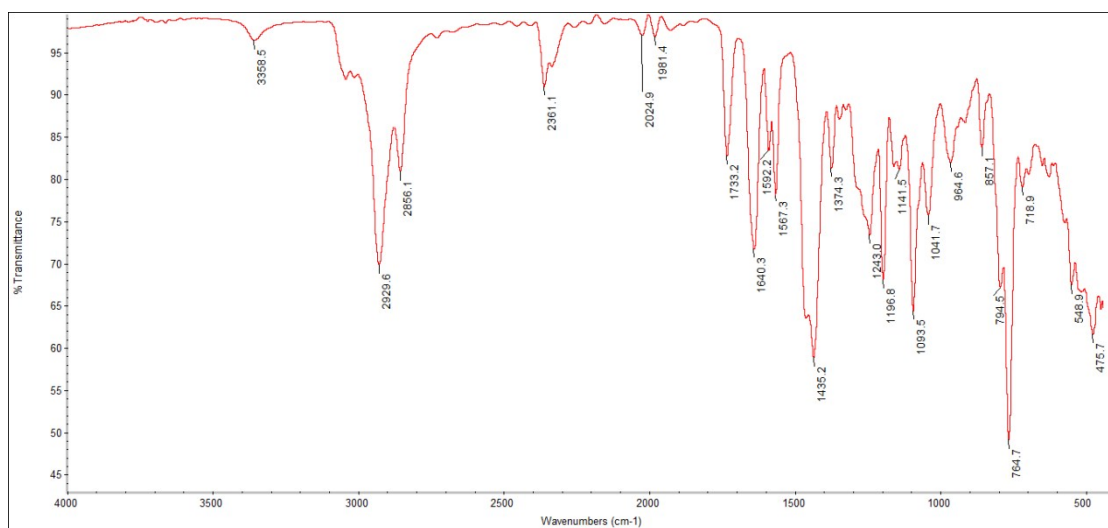

Figure S6. FT-IR spectroscopy of compound **L1**.

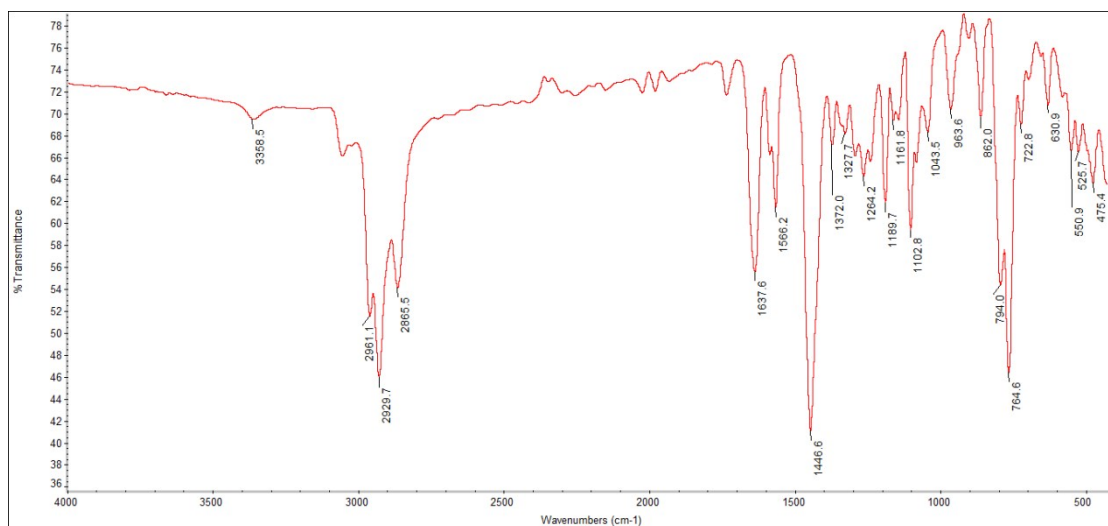

**Figure S7.** FT-IR spectroscopy of compound L2.

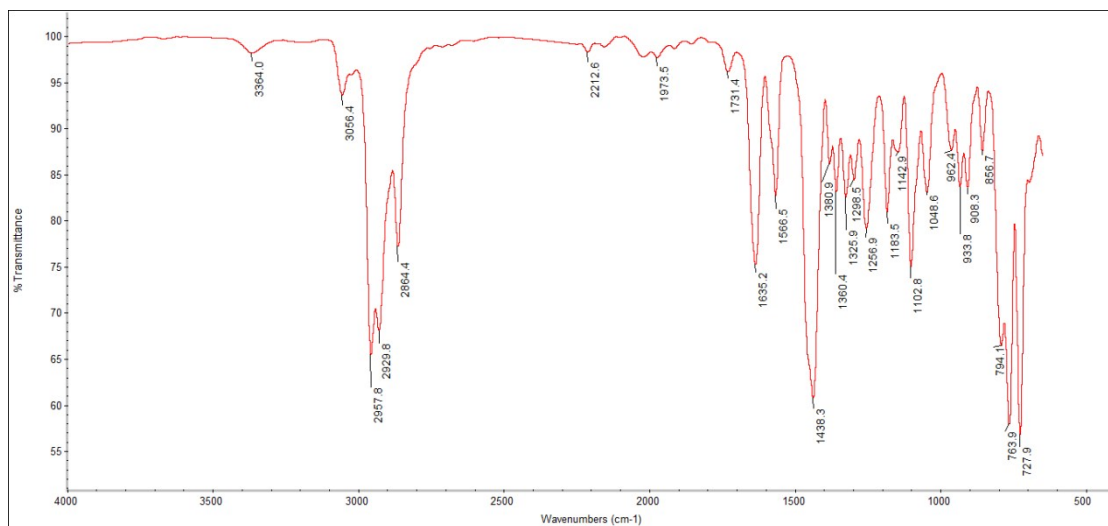

**Figure S8.** FT-IR spectroscopy of compound L3.

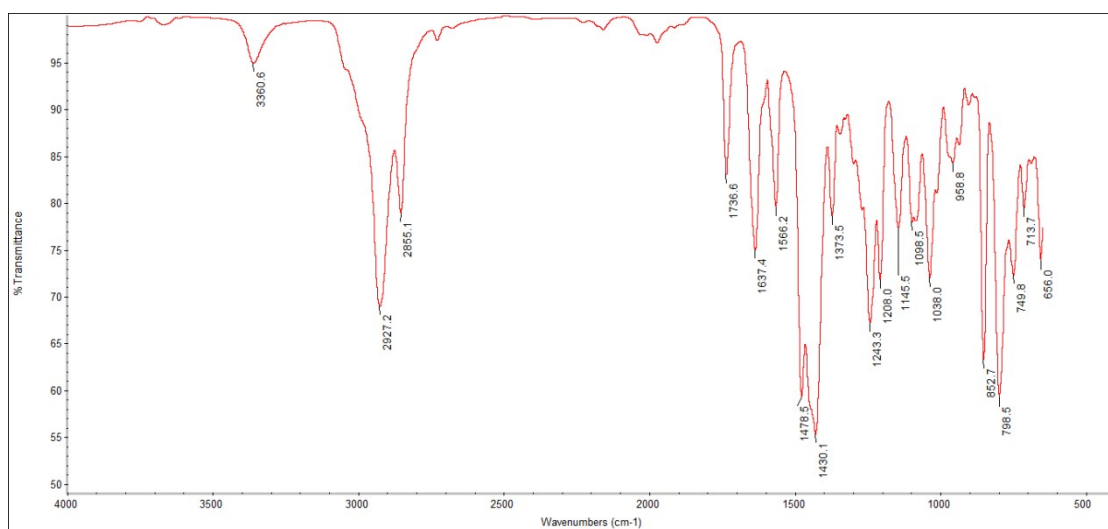

**Figure S9.** FT-IR spectroscopy of compound L4.



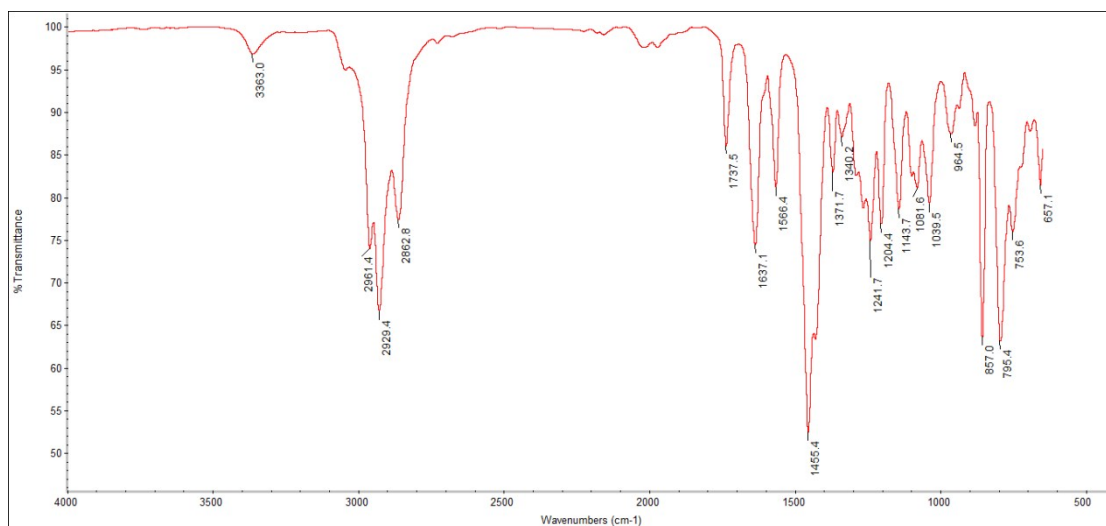

**Figure S10.** FT-IR spectroscopy of compound L5.

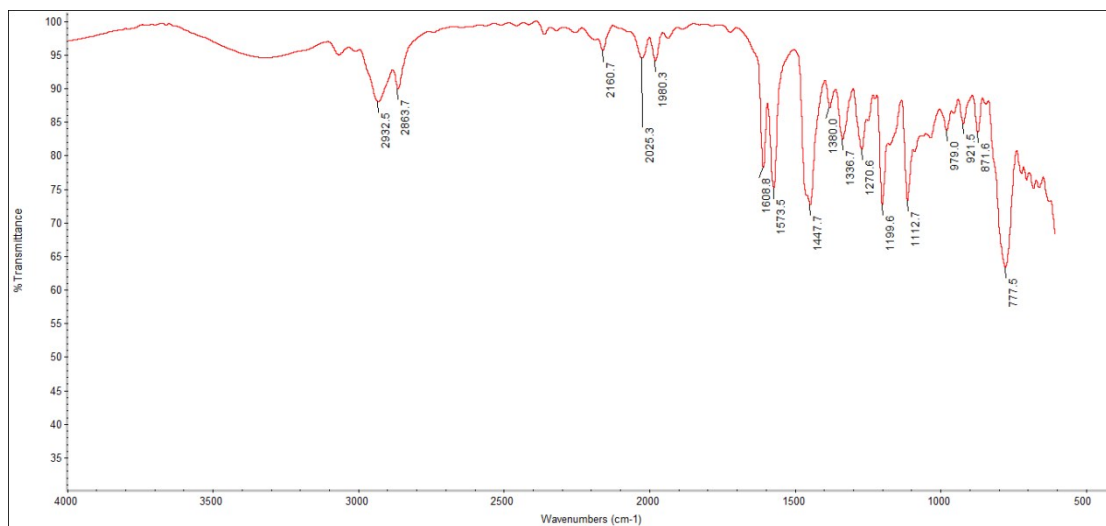

**Figure S11.** FT-IR spectroscopy of complex Ni1.

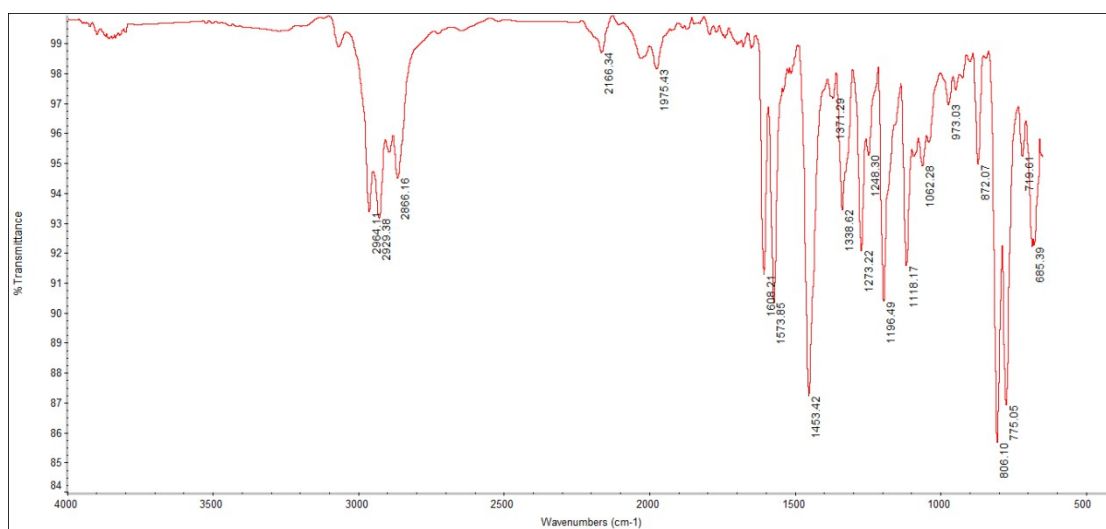

**Figure S12.** FT-IR spectroscopy of complex Ni2.

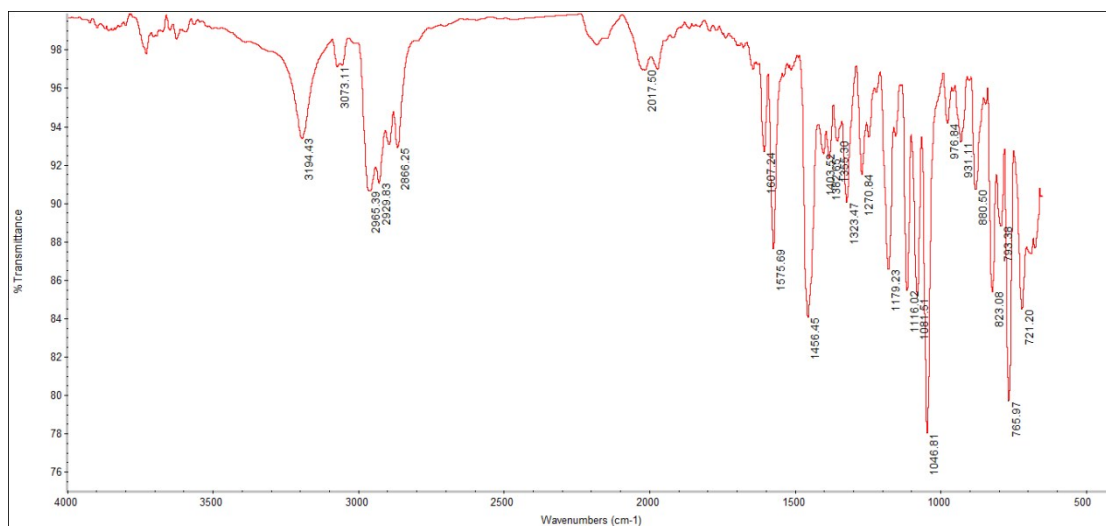

**Figure S13.** FT-IR spectroscopy of complex Ni3.

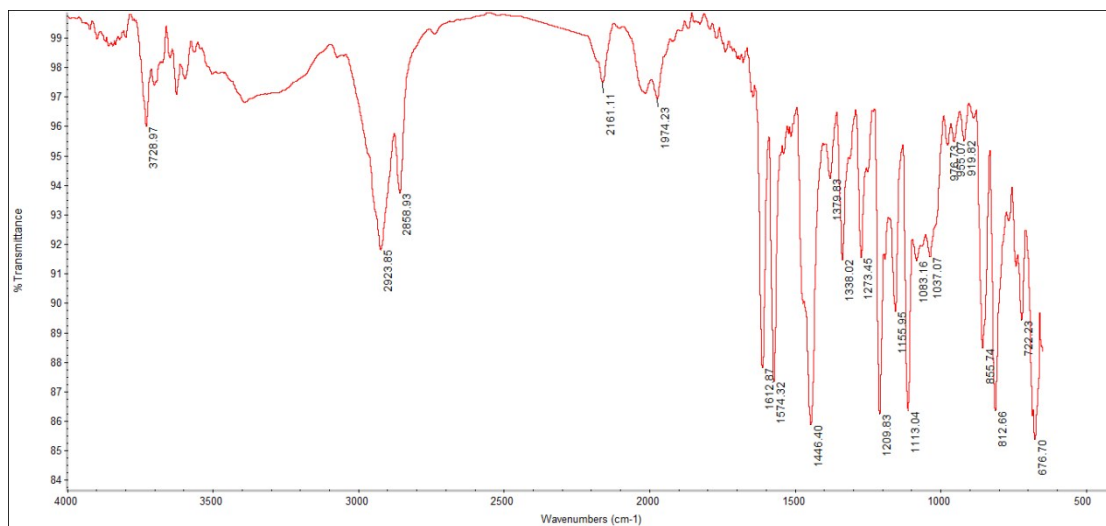

**Figure S14.** FT-IR spectroscopy of complex Ni4.

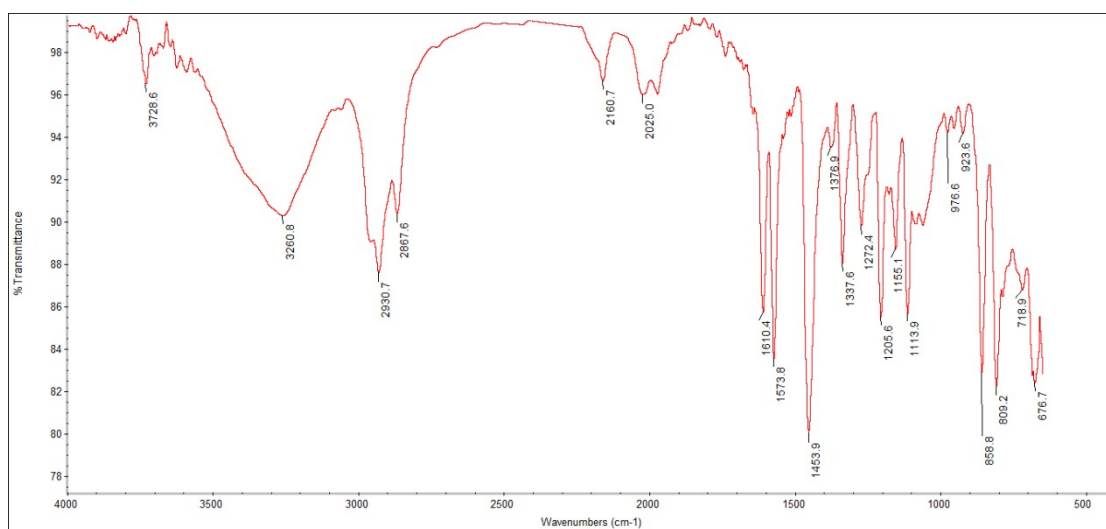

**Figure S15.** FT-IR spectroscopy of complex Ni5.

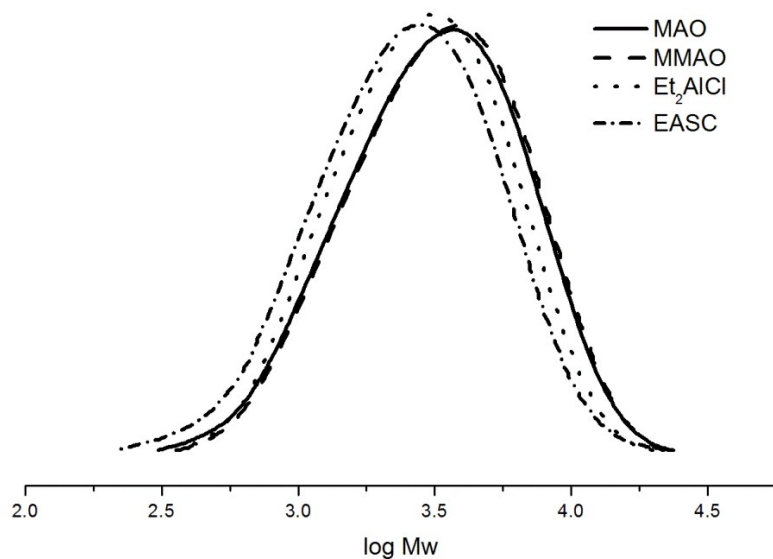

**Figure S16.** The GPC curves of polyethylenes activated by different co-catalysts (Table 2).

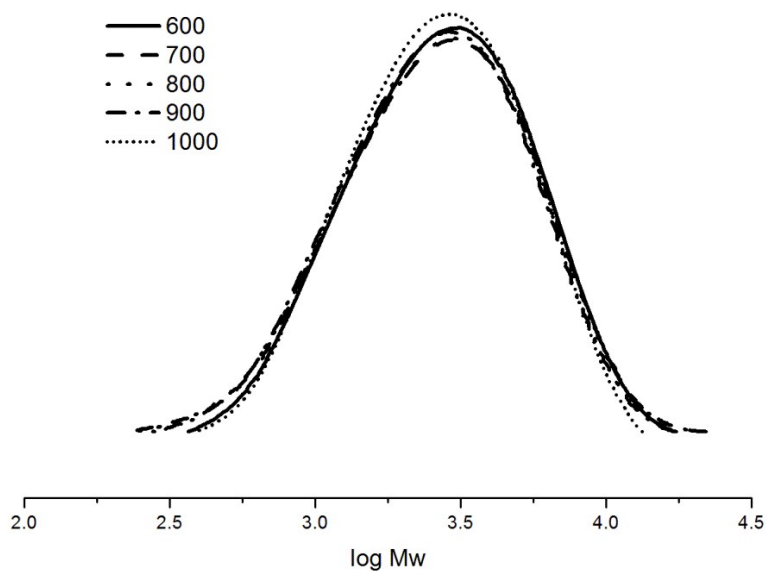

**Figure S17.** The GPC curves of polyethylenes obtained at different ratios of EASC (Entries 1-5, Table 3).

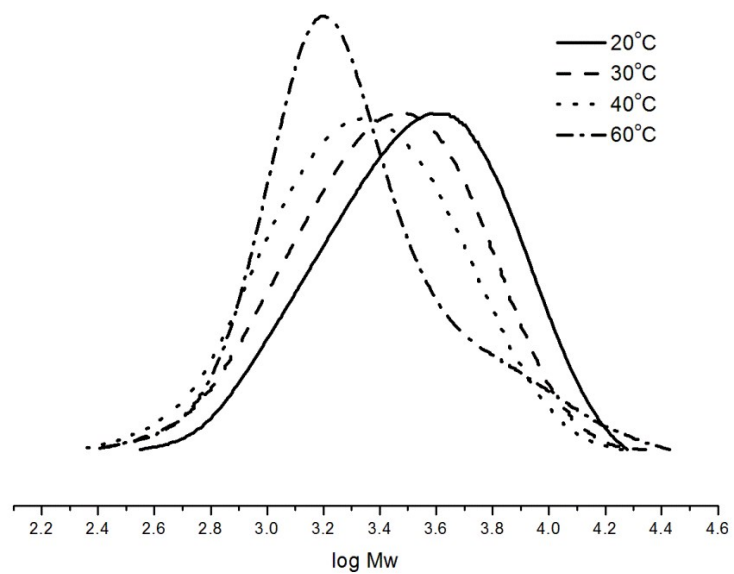

**Figure S18.** The GPC curves of polyethylenes reacted at different temperatures (Entries 3, 6-8, Table 3).

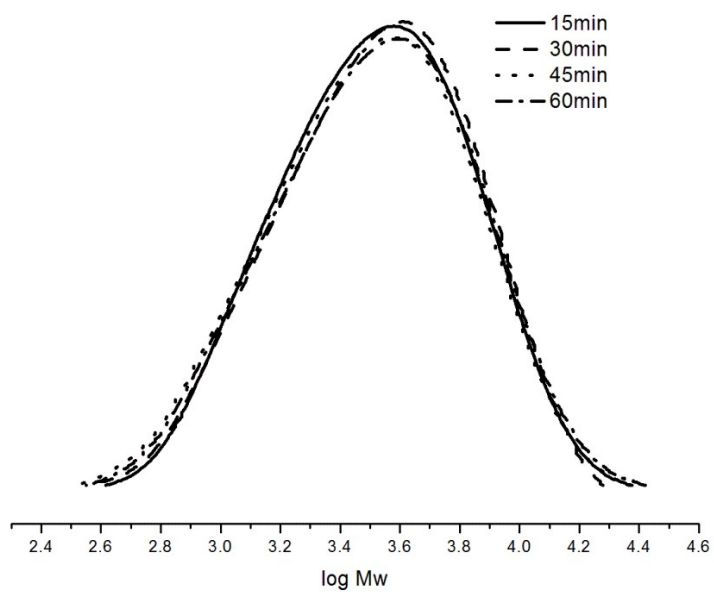

**Figure S19.** The GPC curves of polyethylenes quenched at different times (Entries 6, 10-12, Table 3).

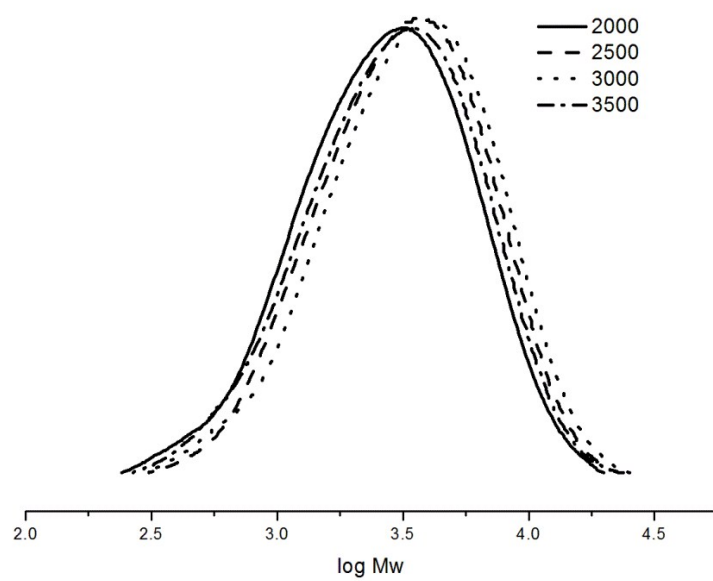

**Figure S20.** The GPC curves of polyethylenes obtained by different ratios of MAO (Entries 1-4, Table 5).
